# Supplementary material for: A low-temperature synthesis of monoclinic VO2 in an atmosphere of air
Source: Royal Society of Chemistry journal article supplement (doi:10.1039/c3ta01494k), 2013-01-01
Supplement: c3ta01494k.pdf [file c3ta01494k.pdf]

## Supplementary Information

# A low-temperature synthesis of monoclinic VO<sub>2</sub> in air atmosphere

Jian Zou, <sup>\*</sup><sup>a</sup> Yungui Peng,<sup>a</sup> and Hua Lin<sup>b</sup>

<sup>a</sup>School of Chemistry and Chemical Engineering, <sup>b</sup>College of Material Science and Engineering,

Southwest University, Chongqing, 400715, R.P.China

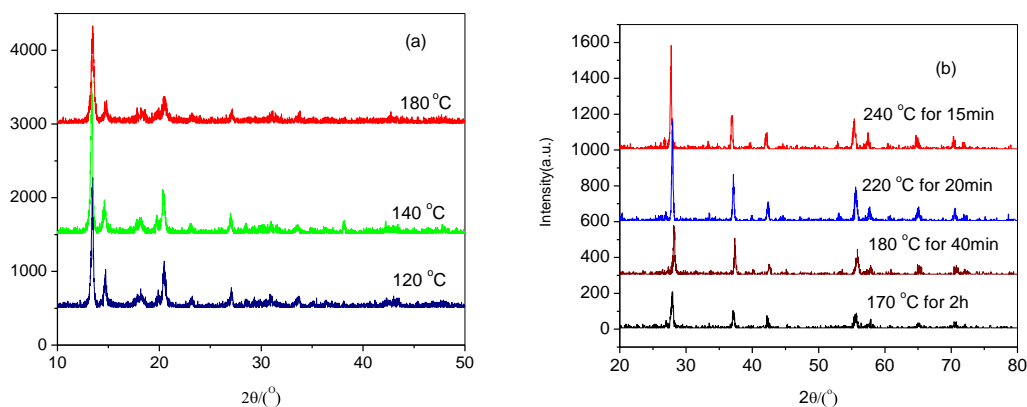

Fig. S1 XRD pattern of VEG synthesized from 120 to 180 °C (a) and monoclinic VO<sub>2</sub> by the thermolysis of VEG from 170 to 240 °C (b).

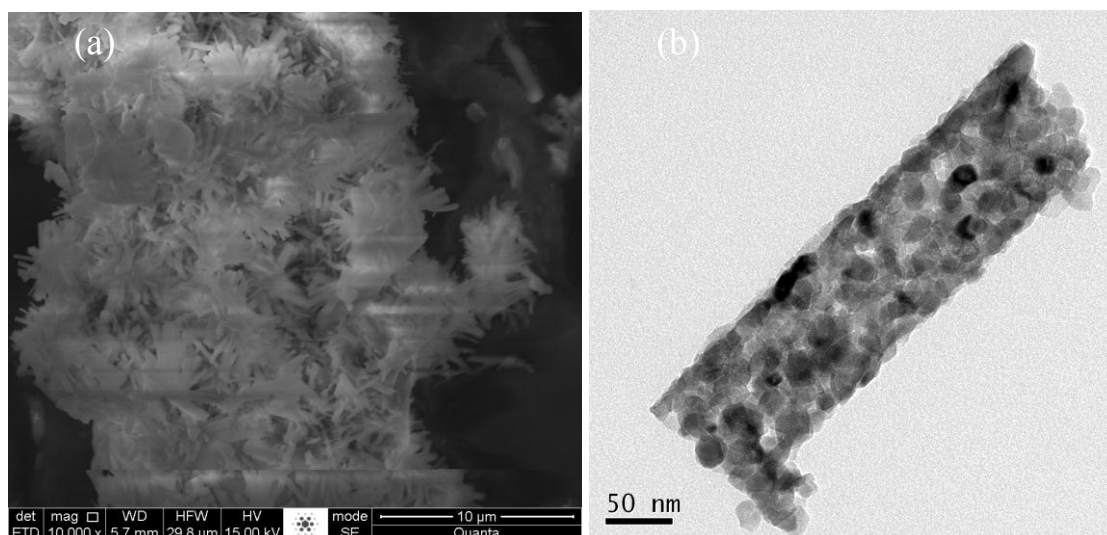

Fig. S2 SEM of VEG precursor synthesized at 160 °C(a) and VO<sub>2</sub>(M) nanorod (b) prepared at 200 °C.

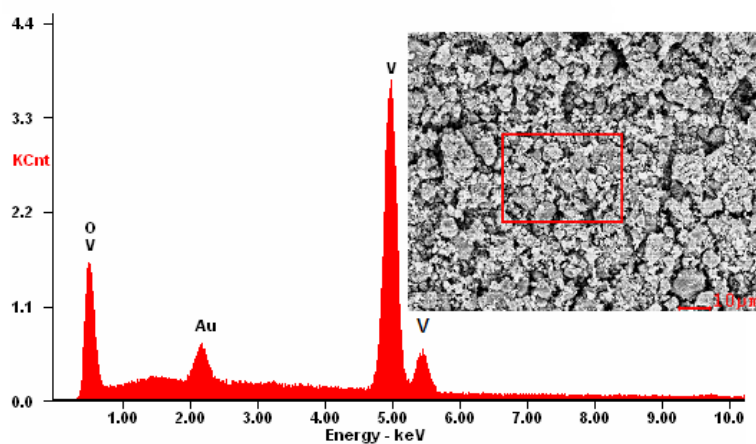

Fig. S3 EDS of VO<sub>2</sub>(M) prepared at 200 °C
